# Supplementary material
Source: PubMed Central journal article supplement (PMC10200288)
Supplement: awac217_supplementary_data.pdf [file awac217_supplementary_data.pdf]

# **Right temporal lobe and socioemotional semantics: semantic behavioural variant frontotemporal dementia**

## **Supplementary Material**

### **Methods**

#### **Functional, Cognitive, and Behavioral Assessments:**

In the main text we focus on the neuropsychological and socioemotional tests most relevant to rATL neurodegeneration. Here we present some of the more general and commonly used neuropsychological tests. A functional assessment was done through a semi-structural interview with the patient's co-participant using the Clinical Dementia Rating Scale (CDR).<sup>1</sup> General cognition was assessed with the Mini-Mental State Examination (MMSE).<sup>2</sup> Verbal and visual episodic memory were tested with the California Verbal Learning Test (CVLT) and a 10-minute delayed free recall of the Benson complex figure recall, respectively.<sup>3</sup> Visuospatial processing was evaluated with the Benson complex figure copy, and the Visual Object Space Perception (VOSP).<sup>4</sup> Executive functioning was evaluated with backward digit span, Trails sequencing, Stroop color-naming test, and design fluency.<sup>5,6</sup> Language production and repetition were evaluated with the Western Aphasia Battery (WAB) subtests for Spontaneous Speech and Repetition. Lexical retrieval and access were evaluated with phonemic verbal fluency and the WAB Auditory Word Recognition subtest. Sentence comprehension was tested with the WAB Sequential Commands subtest and a syntactic comprehension task.<sup>7,8</sup> In the famous faces battery, the famous faces came from a pool of 200 black-and-white photographs of celebrities in different professional categories. Their familiarity was determined by a behavioral study conducted on 20 normal male subjects (age range 18–33 years) who were shown each face on a computer screen for 5 seconds and had to name the person.<sup>9</sup> Only those faces that were named within the 5 seconds by at least 19 subjects were included. The non-famous faces were matched to the famous ones for mean age, sex, and facial expression. All faces were matched for mean luminance. This battery has been used in cohorts that included healthy controls, Alzheimer's disease, behavioral variant frontotemporal dementia, semantic variant primary progressive aphasia, logopenic variant primary progressive aphasia, and nonfluent variant primary progressive aphasia.<sup>10</sup>

#### **Emotional Theory of Mind (eToM):**

The eToM test measures the examinee's ability to conduct theory of mind reasoning and perspective taking with emotional material. Examinees are asked to watch videos of characters interacting in an emotional state, and then make first- and second-order ToM inferences about the characters' knowledge and beliefs

about the others' emotional states. Importantly, this test is designed to measure emotional ToM in a manner that is distinct from concurrent emotion reading deficits; the emotions of the characters are always explicitly named by the narrator, thus the examinee does not need to be able to read emotions while performing the task, only to understand the perspective of the characters on the other's named emotional state. In this task, 8 video clips are shown, displaying two characters in a realistic setting expressing an emotion, with a voice-over narration describing the scene. When one character leaves the scene, a specific event changes the emotion of the other character, and then the first individual returns. After the video clip, the participant is asked three questions. The first is a control question asking what was the event that occurred when one of the characters was gone, and can be used to ascertain that the examinee had a basic level of understanding of the video. The second question measures the examinee's ability to correctly assign a first-order theory of mind belief by asking what the last emotional state was of the individual who constantly stayed in the scene. The third question measures the examinee's ability to correctly assign a second-order theory of mind belief by asking them to identify what one character thinks the other character feels. Half of the scenarios involve a "cheat" condition, in which one of the characters is unwittingly observed by the other, making eToM deductions more complex.

### **Statistical Analysis:**

Receiver operating characteristic curves were generated to differentiate sbvFTD from bvFTD and sbvFTD from svPPA based on socioemotional and neuropsychiatric batteries. Cut-offs for sensitivity and specificity for the six values with best performance differentiating sbvFTD from bvFTD are shown in Supplementary Table 9. Values were chosen based on the highest specificity at a sensitivity over 88% for differentiating sbvFTD from bvFTD.

### **Imaging Analysis:**

We ran a voxel-based morphometry (VBM) analysis to compare the brain MRIs of the rATL-predominant pathology proven group to the rATL-predominant group without pathological data. As these two groups were included based on the same imaging-based index. Although we did not expect any difference between the two groups; we ran this VBM analysis for quality check purposes. VBM preprocessing and analysis were performed using the VBM8 toolbox ([dbm.neuro.uni-jena.de/vbm/](http://dbm.neuro.uni-jena.de/vbm/)) and SPM8 software ([fil.ion.ucl.ac.uk/spm/software/spm8](http://fil.ion.ucl.ac.uk/spm/software/spm8)). Following bias correction and tissue classifications, segmented images were normalized to the Montreal Neurological Institute (MNI) coordinate system space with a 1.0 mm cubic resolution using affine and nonlinear transformations via the Diffeomorphic Anatomical Registration using the Exponentiated Lie Algebra (DARTEL) method.<sup>11</sup> Default measures of the VBM8 toolbox were used in all preprocessing steps, except for the addition of a light clean-up procedure in the

morphologic filtering step. The spatially normalized, segmented, and modulated gray matter images were smoothed with an 8-mm full width at half maximum isotropic Gaussian kernel.

To determine whether there was a right or left laterality in the frontal-predominant group, we calculated the frontal laterality index based on the W-score of the right and left frontal lobes using the formula: Right Frontal / (Right Frontal + Left Frontal). Index value over 50% indicates right frontal predominant atrophy, index value less than 50% indicated left frontal predominant atrophy.

**Results:**

**Quality Assurance Imaging Analysis Results:**

The VBM analysis comparing the brain MRIs of the rATL-predominant pathology proven group to the rATL-predominant group without pathological data did not show any statistically significant differences at corrected  $p < 0.05$ .

**Frontal Atrophy Laterality in the Frontal-Predominant Group:**

Averaging the laterality index values of all the frontal-predominant cases, the mean was 50%, median 51%, and standard deviation 27%. Despite this finding, we want to point out that the focus of greatest atrophy was nevertheless located in the right frontal insula in this group. The area with maximum atrophy when considering only the frontal lobe regions was the right anterior insula (W-score = -2.29), followed by the left frontal operculum (W-score = -2.22), then left anterior insula (W-score = -2.20), and right frontal operculum (W-score = -2.15).

**Supplementary Table.1:** Region of interests (ROI)s included in calculating the atrophy indices based on the Desikan atlas.

| Frontal ROI                                   | Temporal ROI              |
|-----------------------------------------------|---------------------------|
| Anterior cingulate gyrus                      | Amygdala                  |
| Anterior insula                               | Central operculum         |
| Anterior orbital gyrus                        | Entorhinal area           |
| Basal Forebrain                               | Fusiform gyrus            |
| Frontal operculum                             | Hippocampus               |
| Frontal pole                                  | Inferior temporal gyrus   |
| Gyrus rectus                                  | Middle temporal gyrus     |
| Lateral orbital gyrus                         | Parahippocampal gyrus     |
| Middle cingulate gyrus                        | Planum polare             |
| Medial frontal cortex                         | Planum temporale          |
| Middle frontal gyrus                          | Superior temporal gyrus   |
| Medial orbital gyrus                          | Temporal pole             |
| Precentral gyrus medial segment               | Transverse temporal gyrus |
| Superior frontal gyrus medial segment         |                           |
| Opercular part of the inferior frontal gyrus  |                           |
| Orbital part of the inferior frontal gyrus    |                           |
| Posterior insula                              |                           |
| Posterior orbital gyrus                       |                           |
| Precentral gyrus                              |                           |
| Subcallosal area                              |                           |
| Superior frontal gyrus                        |                           |
| Supplementary motor cortex                    |                           |
| Triangular part of the inferior frontal gyrus |                           |

**Supplementary Table 2: Sensitivity of current and previous diagnostic criteria in the rATL-predominant patients:** Based on medical record review, this table shows the percentage of the rATL-predominant patients who met previous and current diagnostic criteria during three different time points: The first three years after illness onset, by the time of the first evaluation, and by the time of the last evaluation. T-test showed no statistically significant differences between the autopsy and the living groups:

| Criteria                                  | Time point                    | rATL Autopsy Group % (n) | rATL Living Group % (n) | rATL Total % (n) |
|-------------------------------------------|-------------------------------|--------------------------|-------------------------|------------------|
| <b>Neary FTD (1998)<sup>12</sup></b>      | First three years of symptoms | 16 (3)                   | 12 (3)                  | 13 (6)           |
|                                           | Initial evaluation            | 47 (9)                   | 56 (15)                 | 52 (24)          |
|                                           | Total illness duration        | 47 (9)                   | 63 (17)                 | 56 (26)          |
| <b>Neary Semantic (1998)<sup>12</sup></b> | First three years of symptoms | 5 (1)                    | 12 (3)                  | 9 (4)            |
|                                           | Initial evaluation            | 6 (1)                    | 15 (4)                  | 11 (5)           |
|                                           | All illness                   | 16 (3)                   | 15 (4)                  | 16 (7)           |
| <b>bv-FTD (2011)<sup>13</sup></b>         | First three years of symptoms | 26 (5)                   | 27 (7)                  | 27 (12)          |
|                                           | Initial evaluation            | 74 (14)                  | 78 (21)                 | 76 (35)          |
|                                           | Total illness duration        | 74 (14)                  | 89 (24)                 | 83 (38)          |
| <b>PPA (2011)<sup>14</sup></b>            | First three years of symptoms | 16 (3)                   | 12 (3)                  | 13 (6)           |
|                                           | Initial evaluation            | 16 (3)                   | 15 (4)                  | 16 (7)           |
|                                           | All illness                   | 16 (3)                   | 15 (4)                  | 16 (7)           |
| <b>svPPA (2011)<sup>14*</sup></b>         | First three years of symptoms | 26 (5)                   | 42 (11)                 | 36 (16)          |
|                                           | Initial evaluation            | 68 (13)                  | 85 (23)                 | 78 (36)          |
|                                           | Total illness duration        | 68 (13)                  | 92 (25)                 | 83 (38)          |

\* Meet semantic variant criteria but not general PPA criteria.

**Supplementary Table 3: The sequence of the first two symptoms in the rATL-predominant group.**

| Sequence of the first two symptoms    |                             |                                                                           |
|---------------------------------------|-----------------------------|---------------------------------------------------------------------------|
| First symptoms (n)                    | Second symptoms             | Number of patients with specific sequence (first and second symptoms) (%) |
| <b>Loss of empathy (19)</b>           | ➔ person-specific knowledge | 8 (42)                                                                    |
|                                       | ➔ compulsions               | 8 (42)                                                                    |
|                                       | ➔ verbal semantics          | 3 (16)                                                                    |
| <b>Person-specific knowledge (12)</b> | ➔ loss of verbal semantics  | 8 (66)                                                                    |
|                                       | ➔ loss of empathy           | 3 (25)                                                                    |
|                                       | ➔ apathy                    | 1 (8)                                                                     |
| <b>Verbal semantic loss (5)</b>       | ➔ person-specific knowledge | 3 (60)                                                                    |
|                                       | ➔ loss of empathy           | 1 (15)                                                                    |
|                                       | ➔ Impaired judgment         | 1 (15)                                                                    |
| <b>Compulsions (4)</b>                | ➔ loss of empathy           | 2 (50)                                                                    |
|                                       | ➔ person-specific knowledge | 2 (50)                                                                    |
| <b>Apathy (2)</b>                     | ➔ loss of empathy           | 1 (50)                                                                    |
|                                       | ➔ Person-specific knowledge | 1 (50)                                                                    |
| <b>Disinhibition (2)</b>              | ➔ loss of empathy           | 2 (100)                                                                   |
| <b>Impaired judgment (1)</b>          | ➔ compulsions               | 1 (100)                                                                   |
| <b>Episodic memory loss (1)</b>       | ➔ compulsions               | 1 (100)                                                                   |

**Supplementary Table 4: Statistical comparison of the early clinical symptoms.**

| Symptoms present in the first three symptoms    | rATL vs frontal |              | rATLI vs IATL |          | IATL vs frontal |                |
|-------------------------------------------------|-----------------|--------------|---------------|----------|-----------------|----------------|
|                                                 | $\chi^2$        | <i>p</i>     | $\chi^2$      | <i>p</i> | $\chi^2$        | <i>p</i>       |
| Loss of empathy                                 | 22.04           | <.001        | 11.2          | <.001    | 1.54            | 0.214          |
| Verbal semantic                                 | 17.86           | <.002        | 32.62         | <.001    | 90.1            | <.001          |
| Person-specific knowledge                       | 56.16           | <.001        | 3.32          | 0.68     | 36.6            | <.001          |
| Complex compulsions/rigid thought process       | 19.54           | <.001        | 1.03          | 0.308    | 12.3            | <.001          |
| Repetitive motor behavior, hoarding, obsessions | 8.49            | <b>0.004</b> | 0.03          | 0.863    | 8.7             | <b>0.003</b>   |
| Apathy                                          | 11.56           | <.001        | 1.54          | 0.213    | 21.7            | < <b>0.001</b> |
| Disinhibition                                   | 5.22            | <b>0.022</b> | 0.814         | 0.367    | 10.78           | <b>0.001</b>   |
| Lack of judgment/dysexecutive                   | 18.86           | <.001        | 0             | 0.99     | 21.1            | < <b>.001</b>  |
| Episodic memory                                 | 4.03            | <b>0.045</b> | 3.2           | 0.072    | <b>0.003</b>    | 0.955          |
| Altered food preference                         | 0.904           | 0.342        | 3.63          | 0.057    | 1.56            | 0.21           |
| Motor neuron disease                            | 0.051           | 0.821        | 0.013         | 0.909    | 0.13            | 0.718          |
| Problems Navigation                             | 0.66            | 0.416        | 0             | 0        | 0.778           | 0.378          |

Bold represents statistically significant results.

**Supplementary Table 5: Apathy and Disinhibition in the Neuropsychiatric Inventory.**

|                                                                                                                                                                                                                                                                     | rATL*                 | Frontal*             | IATL*                  |
|---------------------------------------------------------------------------------------------------------------------------------------------------------------------------------------------------------------------------------------------------------------------|-----------------------|----------------------|------------------------|
| <b>Apathy</b>                                                                                                                                                                                                                                                       |                       |                      |                        |
| Has the patient lost interest in the world around him/her? Has he/she lost interest in doing things or lack motivation for starting new activities? Is he/she more difficult to engage in conversation or in doing chores? Is the patient apathetic or indifferent? | 32 (37) <sup>§</sup>  | 44 (48) <sup>m</sup> | 12 (25) <sup>§,m</sup> |
| Does the patient seem less spontaneous and less active than usual?                                                                                                                                                                                                  | 28 (30)               | 37 (42)              | 9 (11)                 |
| Is the patient less likely to initiate a conversation?                                                                                                                                                                                                              | 17 (29) <sup>§</sup>  | 31 (42)              | 10 (11) <sup>§</sup>   |
| Is the patient less affectionate or lacking in emotions when compared to his/her usual self?                                                                                                                                                                        | 22 (27)               | 32 (41)              | 5 (11)                 |
| Does the patient contribute less to household chores?                                                                                                                                                                                                               | 18 (30) <sup>°</sup>  | 36 (41) <sup>°</sup> | 6 (11)                 |
| Does the patient seem less interested in the activities and plans of others?                                                                                                                                                                                        | 22 (30)               | 35 (43)              | 5 (11)                 |
| Has the patient lost interest in friends and family members?                                                                                                                                                                                                        | 18 (30)               | 33 (42)              | 5 (10)                 |
| Is the patient less enthusiastic about his/her usual interests?                                                                                                                                                                                                     | 22 (30)               | 34 (40)              | 7 (11)                 |
| Does the patient show any other signs that he/she doesn't care about new things?                                                                                                                                                                                    | 10 (29) <sup>§</sup>  | 15 (41) <sup>m</sup> | 5 (11) <sup>§,m</sup>  |
| <b>Disinhibition</b>                                                                                                                                                                                                                                                |                       |                      |                        |
| Does the patient seem to act impulsively without thinking? Does he/she do/say things that are not usually done or said in public? Does he/she do things that are embarrassing to you or others?                                                                     | 32 (37)               | 40 (48)              | 10 (25)                |
| Does the patient act impulsively without appearing to consider the consequences?                                                                                                                                                                                    | 27 (29)               | 37 (39)              | 8 (10)                 |
| Does the patient talk to total strangers as if he/she knew them?                                                                                                                                                                                                    | 16 (30) <sup>§</sup>  | 20 (38) <sup>m</sup> | 7 (10) <sup>§,m</sup>  |
| Does the patient say things to people that are insensitive or hurt their feelings?                                                                                                                                                                                  | 15 (29)               | 23 (39)              | 4 (10)                 |
| Does the patient say crude things or make sexual remarks that they would not usually have said?                                                                                                                                                                     | 3 (30) <sup>°,§</sup> | 13 (38) <sup>°</sup> | 1 (10) <sup>§</sup>    |
| Does the patient talk openly about very personal or private matters not usually discussed in public?                                                                                                                                                                | 6 (29)                | 15 (38)              | 1 (10)                 |
| Does the patient take liberties or touch or hug others in way that is out of character for him/her?                                                                                                                                                                 | 8 (30) <sup>§</sup>   | 8 (37) <sup>m</sup>  | 3 (10) <sup>§,m</sup>  |
| Does the patient show any other signs of loss of control of his/her impulses?                                                                                                                                                                                       | 17 (29)               | 22 (39)              | 6 (10)                 |

\*The first number represents the number of patients who had a positive answer to the question, the number between parentheses is the number of patients whose data on the question is available.

Right temporal different from frontal at <.05: e

Right temporal different from left temporal at <.05: g

Frontal different from left temporal at <.05: m

**Supplementary Table 6: Neuropathological results of the right temporal autopsy group.**

| rATL case | Primary Diagnoses                                                    | Contributing Diagnoses                      | Incidental Diagnoses                                                       | AD Thal Phase | AD Braak Stage | AD CERAD NP Score |
|-----------|----------------------------------------------------------------------|---------------------------------------------|----------------------------------------------------------------------------|---------------|----------------|-------------------|
| P1        | FTLD-TDP Type C                                                      |                                             | 1.Arteriolo sclerosis<br>2. Microinfarct<br>3. CAA<br>4. ADNC              | 1             | 1              | 0                 |
| P2        | FTLD-TDP Type C                                                      |                                             | 1. Vascular brain injury<br>2.Arteriolo sclerosis<br>3. LBD<br>4. ADNC     | 1             | 1              | 1                 |
| P3        | FTLD-TDP Type C                                                      |                                             | 1. AGD<br>2. Arteriolo sclerosis<br>3. CAA<br>4. LBD<br>5.ARTAG<br>6. ADNC | 2             | 2              | 2                 |
| P4        | FTLD-TDP Type C                                                      | Traumatic brain injury; Traumatic tauopathy | 1. AGD.<br>2. Microinfarcts.<br>3.Arteriolo sclerosis<br>4. ADNC           | 1             | 3              | 0                 |
| P5        | FTLD-TDP Type C                                                      |                                             | 1. ADNC<br>2.Vascular malformation                                         | 2             | 1              | 0                 |
| P6        | FTLD-TDP Type C                                                      | AD                                          | 1. AGD<br>2. Arteriolo sclerosis<br>3. CAA                                 | 5             | 6              | 3                 |
| P7        | FTLD-TDP Type C                                                      | FTLD-tau PSP                                | ADNC                                                                       | 1             | 0              | 0                 |
| P8        | FTLD-TDP Type C                                                      | AD                                          | 1. CAA<br>2.Hemorrhagic infarct<br>3. Arteriolo sclerosis                  | 4             | 6              | 3                 |
| P9        | FTLD-TDP Type C                                                      |                                             | ADNC                                                                       | Incomplete    | 2              | 3                 |
| P10       | FTLD-TDP Type C                                                      |                                             | 1. ADNC<br>2. CAA<br>3. Meningioma                                         | 1             | 2              | 0                 |
| P11       | FTLD-TDP Type C                                                      |                                             | ADNC                                                                       | Incomplete    | 2              | 0                 |
| P12       | FTLD-TDP Type C                                                      |                                             |                                                                            | 1             | 2              | 0                 |
| P13       | 1. FTLD-TDP Type C<br>2. Primary lateral sclerosis PLS-TDP           |                                             | 1.Arteriolo sclerosis<br>2.ADNC                                            | 1             | 0              | 0                 |
| P14       | 1. FTLD-TDP Type B<br>2. MND, lower motor neuron only MND-TDP        |                                             | 1. Arteriolo sclerosis<br>2. ADNC                                          | 1             | 1              | 0                 |
| P15       | FTLD-TDP type A                                                      |                                             | ADNC                                                                       | NA            | 2              | NA                |
| P16       | 1.FTLD-TDP Unclassifiable<br>2. MND, lower motor neuron only MND-TDP | 1. Lacunar infarct<br>2. Microinfarct       | 1. AGD<br>2. Arteriolo sclerosis<br>3. CAA<br>4. ADNC                      | 4             | 1              | 3                 |
| P17       | FTLD-tau Pick`s type                                                 |                                             |                                                                            | 0             | 0              | 0                 |
| P18       | FTLD-tau Pick`s type                                                 |                                             | 1. Arteriolo sclerosis<br>2. ADNC                                          | 1             | 1              | 0                 |
| P19       | FTLD-tau unclassifiable 4R tauopathy                                 |                                             | 1. ADNC<br>2. Vascular brain injury                                        | Incomplete    | 0              | 0                 |

Abbreviations: AD = Alzheimer`s disease; ADNC = Alzheimer`s disease neuropathological changes; AGD = Argyrophilic grain disease, ARTAG = Age-related tau astroglipathy, CAA = Cerebral amyloid angiopathy. PSP = Progressive supranuclear palsy. FTLD = Frontotemporal lobar degeneration. TDP-43 = TAR DNA-binding protein 43.

**Supplementary Table 7: APOE4 prevalence.**

|      | Frontal<br>n (%) | Healthy Control<br>n (%) | Left Temporal<br>n (%) | Right Temporal<br>n (%) |
|------|------------------|--------------------------|------------------------|-------------------------|
| E2E2 | 1 (1.3)          |                          |                        |                         |
| E2E3 | 12 (16)          | 7 (12)                   | 7 (11)                 | 7.2 (18)                |
| E2E4 | 1 (1.3)          |                          |                        |                         |
| E3E3 | 42 (56)          | 40 (69)                  | 36 (58)                | 22 (55)                 |
| E3E4 | 19 (25.3)        | 11 (19)                  | 19 (30)                | 8.8 (22)                |

**Supplementary Table 8: Sensitivity and specificity of the proposed diagnostic criteria.**

| Sample = sbvFTD and<br>bvFTD patients | First Three<br>Years | First Visit | All Visits |
|---------------------------------------|----------------------|-------------|------------|
| Sensitivity                           | 81.39                | 86.04       | 93.02      |
| Specificity                           | 84.28                | 82.86       | 81.43      |

**Supplementary Table 9: Area under the curve and sensitivity and specificity of certain cutoff points of the main socioemotional and neuropsychiatric tests in differentiating sbvFTD from bvFTD and svPPA.**

| sbvFTD-bvFTD           | AUC | Cutoff | Sensitivity | Specificity |
|------------------------|-----|--------|-------------|-------------|
| FF-Recognition         | 98  | 12.5   | 100         | 88          |
| TASIT - sarcasm        | 90  | 6.5    | 88          | 67          |
| TOM - Cognitive        | 76  | 10.5   | 93          | 56          |
| BNT                    | 75  | 6.50   | 93          | 57          |
| PPVT                   | 72  | 7.5    | 92          | 70          |
| IAS - Dominance        | 71  | 25     | 92          | 63          |
| sbvFTD-svPPA           | AUC | Cutoff | Sensitivity | Specificity |
| FF-Recognition         | 82  | 10.5   | 84          | 50          |
| TASIT - sarcasm        | 74  | 5.5    | 73          | 59          |
| TOM - emotional        | 65  | 11.5   | 82          | 66          |
| BNT                    | 73  | 2.5    | 85          | 56          |
| IAS - cold             | 75  | 21.5   | 84          | 58          |
| CATS - affect matching | 78  | 9.5    | 90          | 57          |

## References

1. Morris JC. The Clinical Dementia Rating (CDR): current version and scoring rules [see comments]. *Neurology*. 1993;43(11):2412-2414.
2. Folstein MF, Folstein SE, McHugh PR. "Mini-mental state": A practical method for grading the cognitive state of patients for the clinician. *J Psychiatr Res*. 1975;12(3):189-198. doi:[https://doi.org/10.1016/0022-3956\(75\)90026-6](https://doi.org/10.1016/0022-3956(75)90026-6)
3. Delis DC, Kramer JH, Kaplan E, Ober BA. *California Verbal Learning Test*. Second. The Psychological Corporation; 2000.



4. Warrington EK, James M. *The Visual Object and Space Perception Battery*. Thames Valley Test Company; 1991.
5. Wechsler D. *Wechsler Memory Scale*. Third. The Psychological Corporation; 1997.
6. Reitan RM. Validity of the Trail Making Test as an Indicator of Organic Brain Damage. *Percept Mot Skills*. 1958;8(3):271-276. doi:10.2466/pms.1958.8.3.271
7. Risser AH, Spreen O. The western aphasia battery. *J Clin Exp Neuropsychol*. 1985;7(4):463-470. doi:10.1080/01688638508401277
8. Wilson SM, Henry ML, Besbris M, et al. Connected speech production in three variants of primary progressive aphasia. *Brain*. 2010;133(Pt 7):2069-2088. [http://www.ncbi.nlm.nih.gov/entrez/query.fcgi?cmd=Retrieve&db=PubMed&dopt=Citation&list\\_uids=20542982](http://www.ncbi.nlm.nih.gov/entrez/query.fcgi?cmd=Retrieve&db=PubMed&dopt=Citation&list_uids=20542982)
9. Gorno-Tempini ML, Price CJ. Identification of famous faces and buildings. A functional neuroimaging study of semantically unique items. *Brain*. 2001;124(10):2087-2097. doi:10.1093/brain/124.10.2087
10. Borghesani V, Narvid J, Battistella G, et al. "Looks familiar, but I do not know who she is": The role of the anterior right temporal lobe in famous face recognition. *Cortex*. 2019;115:72-85. doi:10.1016/j.cortex.2019.01.006
11. Ashburner J. A fast diffeomorphic image registration algorithm. *Neuroimage*. 2007;38(1):95-113. doi:10.1016/j.neuroimage.2007.07.007
12. Neary D, Snowden JS, Gustafson L, et al. Frontotemporal lobar degeneration: a consensus on clinical diagnostic criteria. *Neurology*. 1998;51(6):1546-1554. doi:10.1212/wnl.51.6.1546
13. Rascovsky K, Hodges JR, Knopman D, et al. Sensitivity of revised diagnostic criteria for the behavioural variant of frontotemporal dementia. *Brain*. 2011;134(Pt 9):2456-2477. doi:10.1093/brain/awr179
14. Gorno-Tempini ML, Hillis AE, Weintraub S, et al. Classification of primary progressive aphasia and its variants. *Neurology*. 2011;76(11):1006-1014. doi:10.1212/WNL.0b013e31821103e6
